# Supplementary material for: Copper sulfide nanoribbon growth triggered by carbon nanotube aggregation via dialysis
Source: RSC Adv. 2022 Nov 2;12(48):31363–8. doi: 10.1039/d2ra04832a (PMC9627581; doi:10.1039/d2ra04832a)
Supplement: RA-012-D2RA04832A-s001 [file RA-012-D2RA04832A-s001.pdf]

Supporting Information for

**Copper Sulfide Nanoribbon Growth Triggered by Carbon Nanotube Aggregation via Dialysis**

**XPS characterization of a sample after dialysis.**

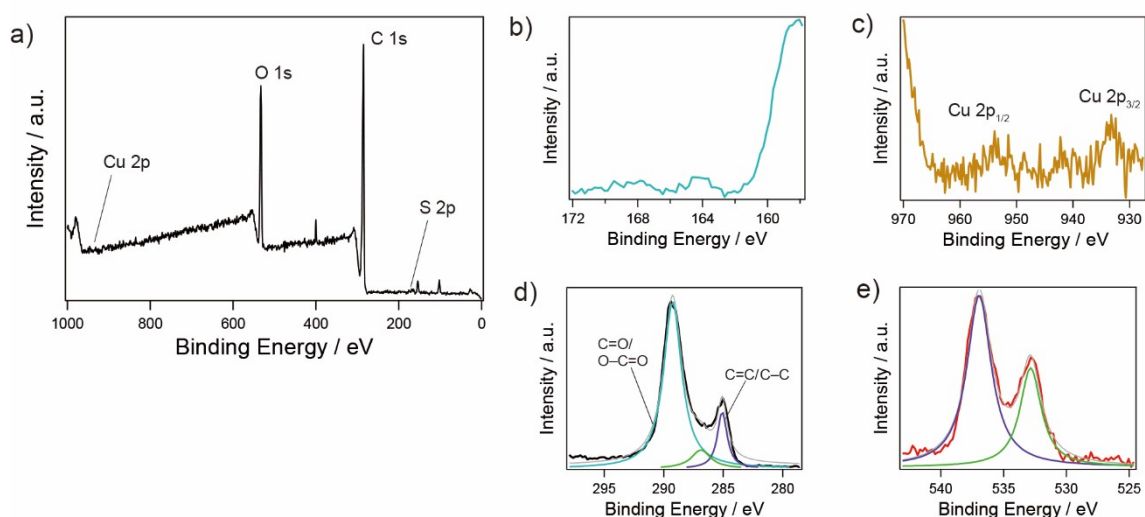

**Figure S1.** (a) XPS analysis and high resolution XPS spectrum of (b) S 2p, (c) Cu 2p, (d) C 1s and (e) O 1s for a sample obtained after dialysis. The obtained C-O peak in the XPS data is understood to be derived from the defect of SWCNTs or unremoved thermoresponsive polymer, the residues of the sample.

## 1 SEM image and EDS measurement of a dialysis tube.

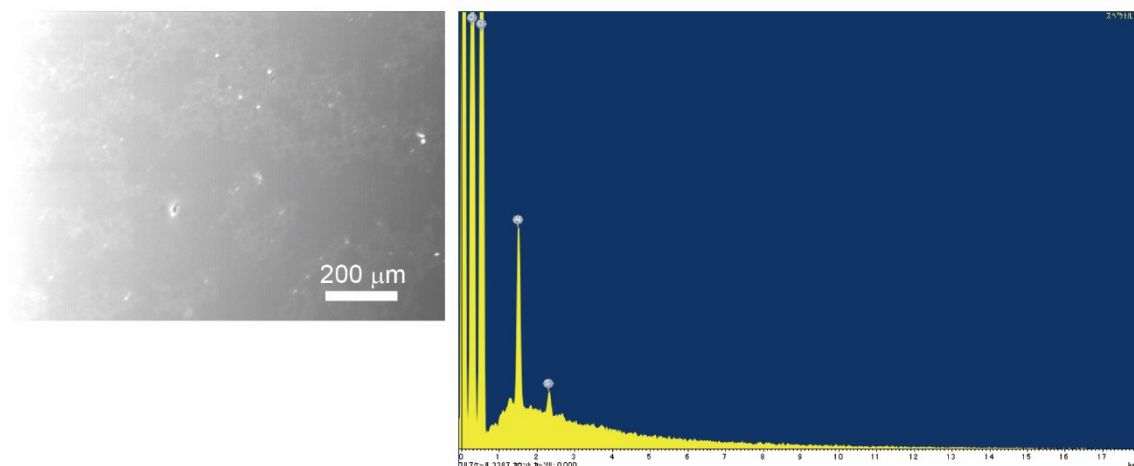

2

3 **Figure S2.** SEM and EDS of the inside of a dialysis tube and a Visking membrane (MWCO: 3,500,  
4 cellulose tube). The EDS peak appearing at 2.3 keV corresponds to S K $\alpha$ . The peak attributed to Al  
5 is background due to the base material used.

6

7

8

9 **TEM images of samples after dialysis for with a pretreated dialysis tube.**

10

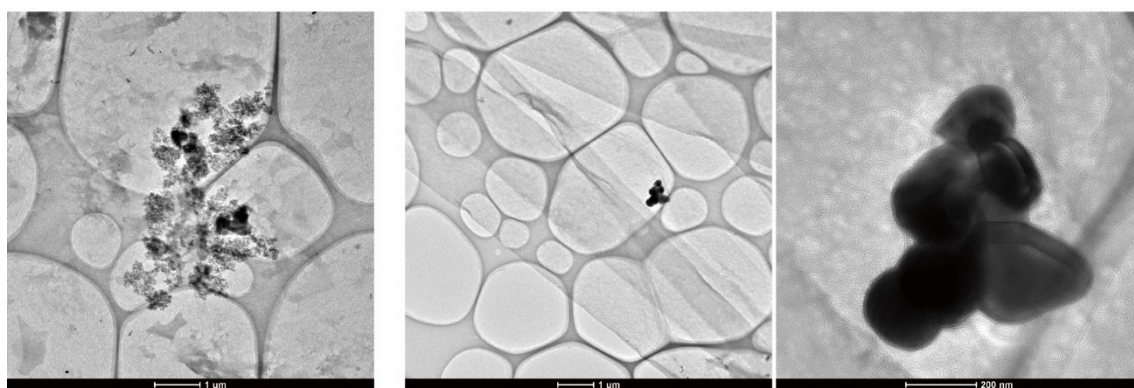

11

12 **Figure S3.** TEM images of samples after dialysis for 48 h with a pretreated dialysis tube  
13 (Spectra/Por®7 Biotech RC Tubing, MWCO: 3.5-5 kD).

14
